# Supplementary material for: Evaluation of Treatment With Talazoparib and Avelumab in Patients With Recurrent Mismatch Repair Proficient Endometrial Cancer
Source: PubMed Central journal article supplement — JAMA Oncol. 2022 Jul 28;8(9):1317–22. doi: 10.1001/jamaoncol.2022.2181 (PMC9335244; doi:10.1001/jamaoncol.2022.2181), 2022-07-28
Supplement: jamaoncol-e222181-s003.pdf [file jamaoncol-e222181-s003.pdf]

## Data Sharing Statement

Konstantinopoulos. Evaluation of Treatment With Talazoparib and Avelumab in Patients With Recurrent Mismatch Repair Proficient Endometrial Cancer. *JAMA Oncol.* Published July 28, 2022. doi:10.1001/jamaoncol.2022.2181

### Data

**Data available:** Yes

**Data types:** Deidentified participant data

**How to access data:** [panagiotis\\_konstantinopoulos@dfci.harvard.edu](mailto:panagiotis_konstantinopoulos@dfci.harvard.edu)

**When available:** With publication

### Supporting Documents

**Document types:** None

### Additional Information

**Who can access the data:** Researchers whose proposed use of the data has been approved

**Types of analyses:** For a specified approved purpose

**Mechanisms of data availability:** After approval of a proposal
